# Supplementary material
Source: publisher figshare collection journal article supplement (https://f1000.figshare.com/articles/dataset/_/1328483)
Supplement: Supplementary file 10 [file 1]

Total biomedical citations (Abstract available) 2014  
20 countries with most total biomedical citations

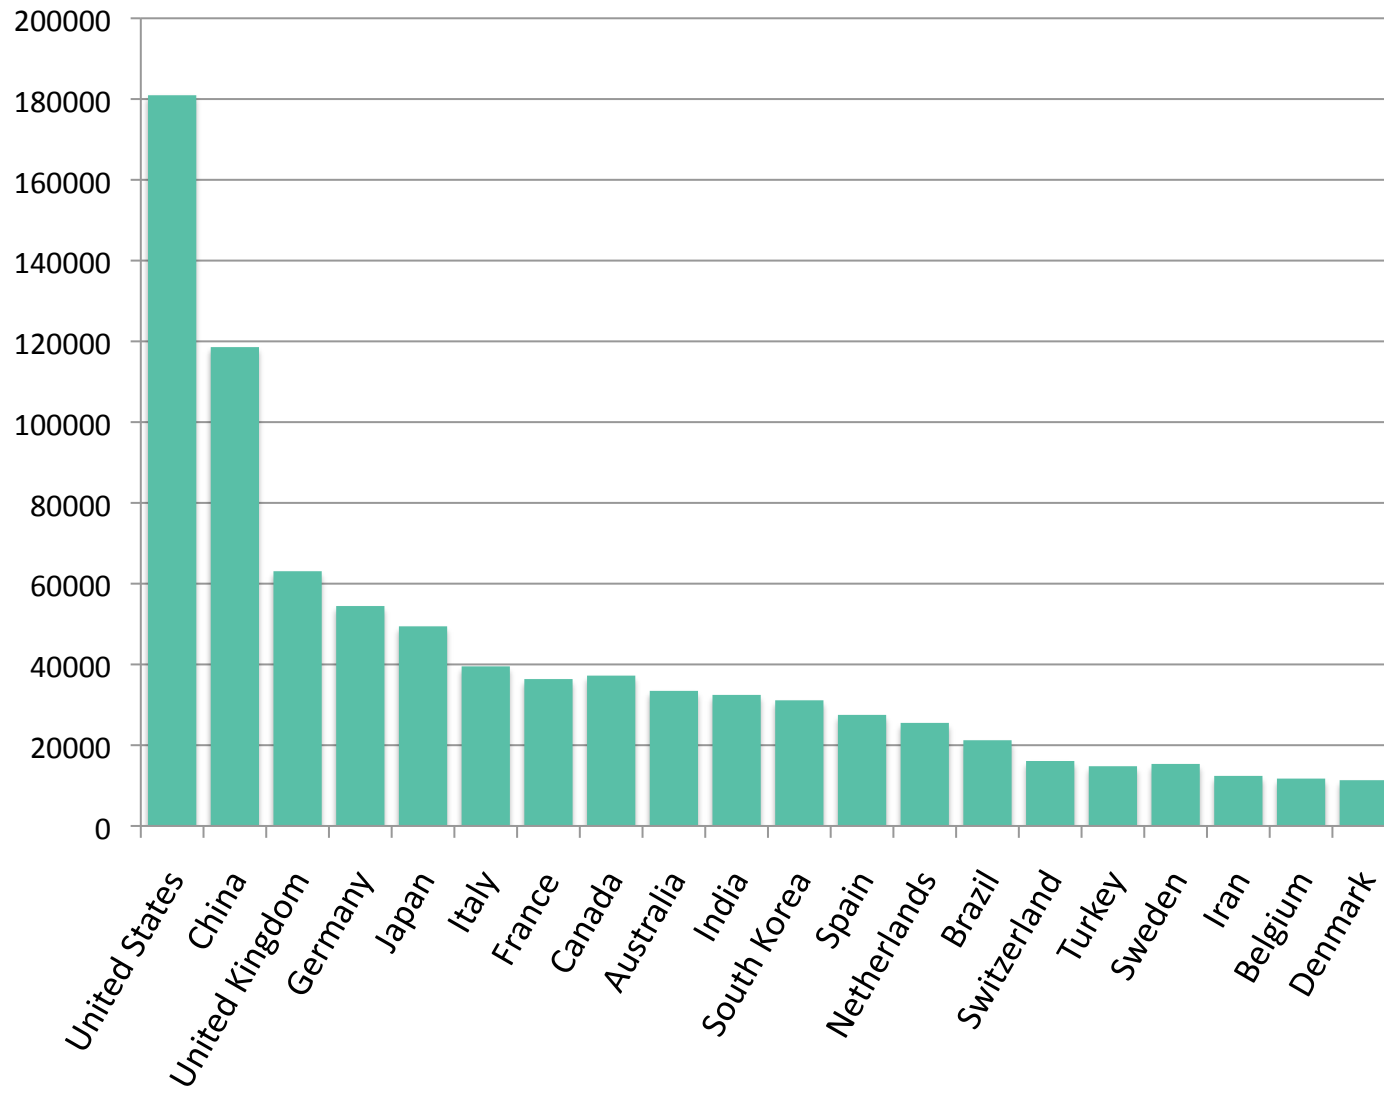

Fig. 28
