# Supplementary material
Source: publisher figshare collection journal article supplement (https://f1000.figshare.com/articles/dataset/_/1328483)
Supplement: Supplementary file 14 [file 1]

Ebola/Ebolavirus in Title citations (Abstract available) 2014  
6 countries with most Ebola-related citations

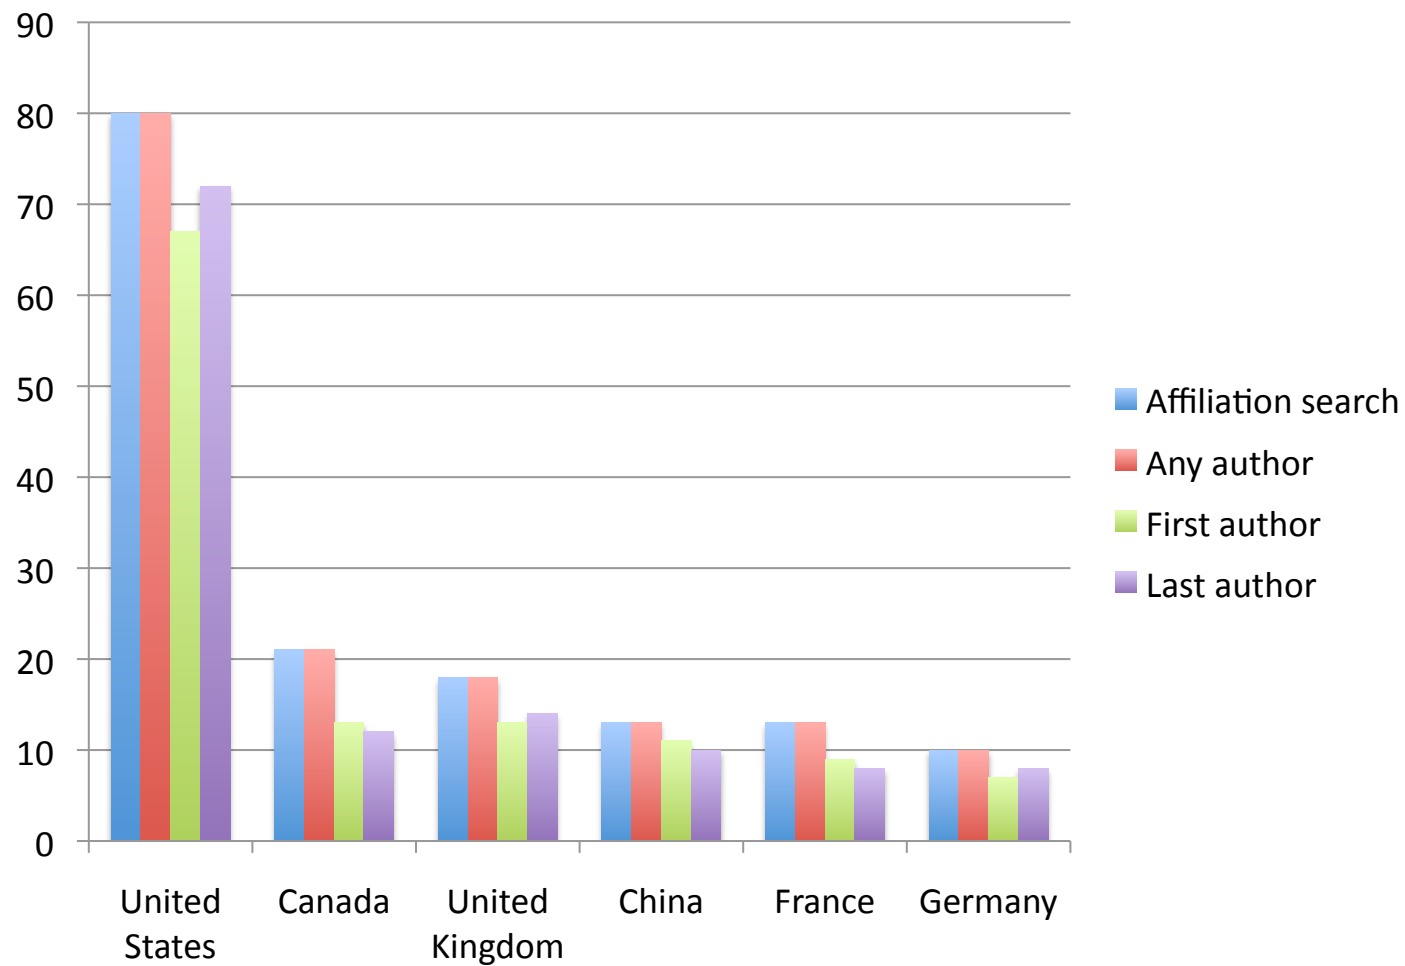

Fig. 32
