# Supplementary material
Source: publisher figshare collection journal article supplement (https://f1000.figshare.com/articles/dataset/_/1328483)
Supplement: Supplementary file 18 [file 1]

Total biomedical citations and Ebola/Ebolavirus in Title citations  
3 countries with most Ebola cases: Sierra Leone, Liberia, Guinea

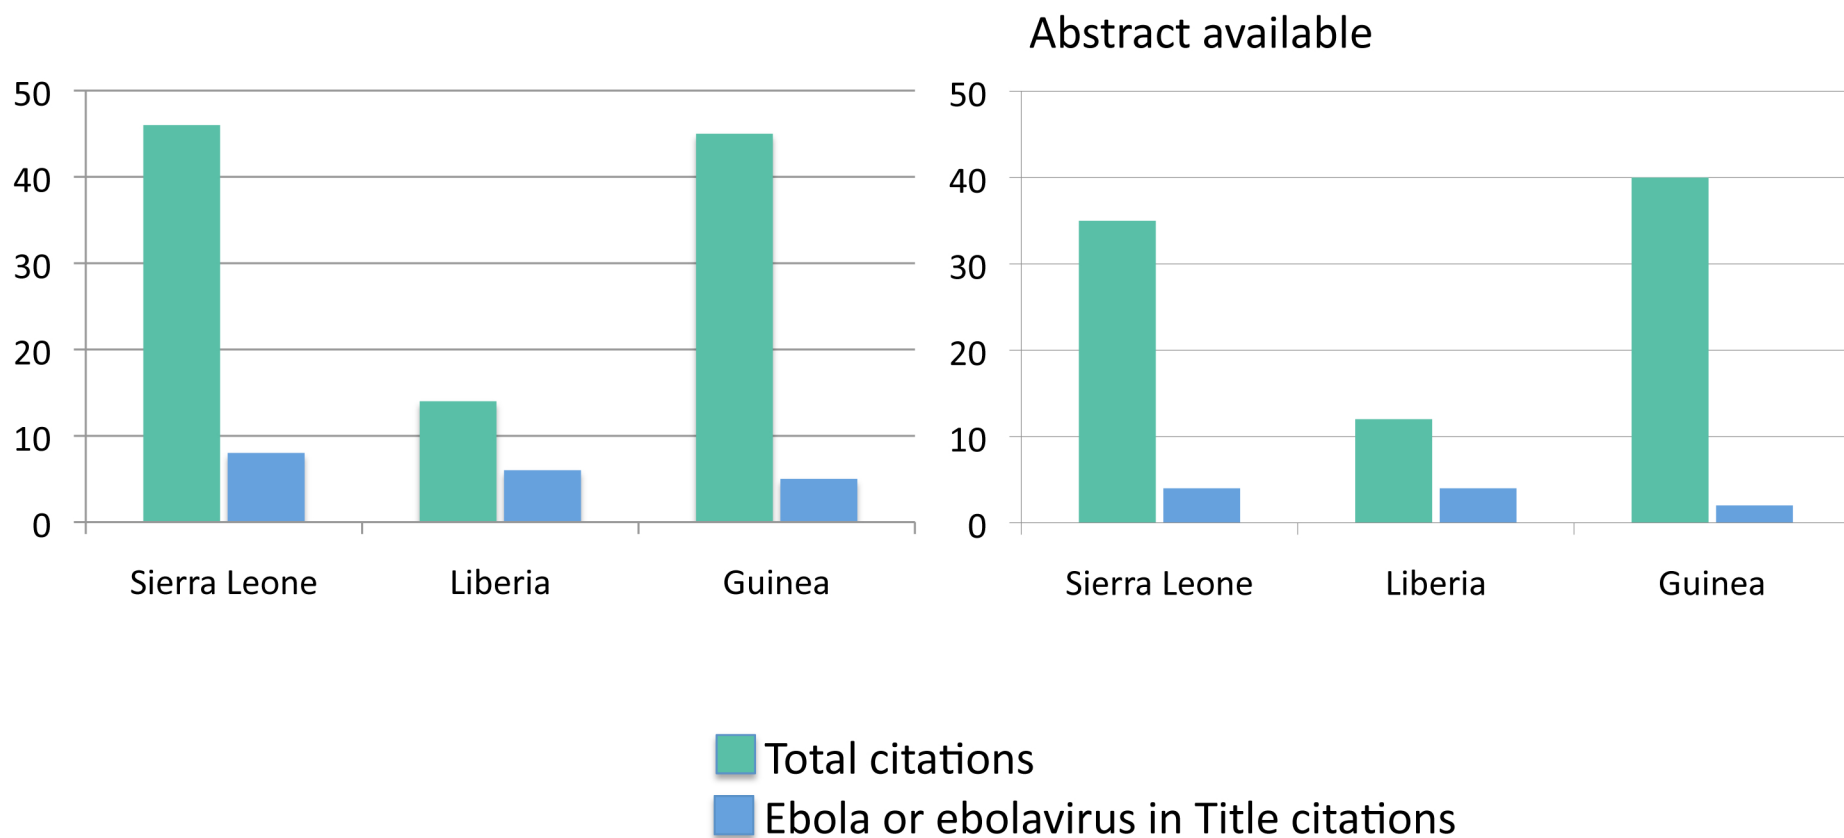

Fig. 35
