# Supplementary material
Source: publisher figshare collection journal article supplement (https://f1000.figshare.com/articles/dataset/_/1328483)

Ebola/Ebolavirus in Title citations (Abstract available) 1995-2014

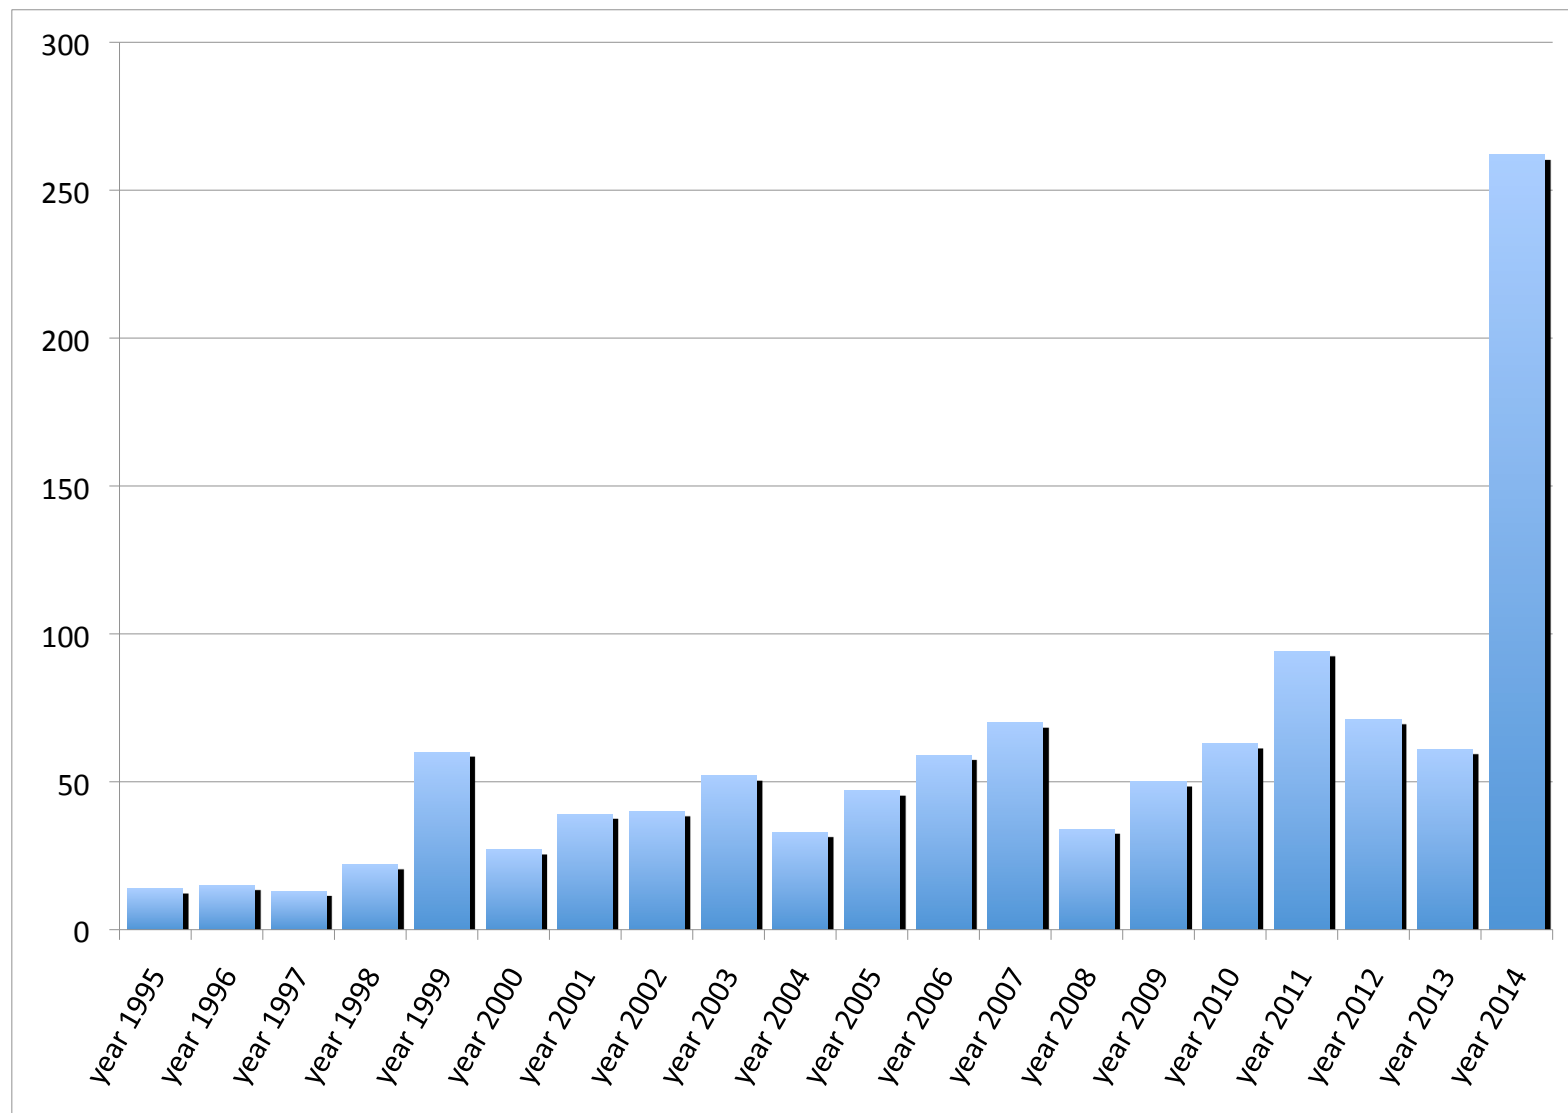

Fig. 4

Supplement: Supplementary file 1 [file 1]

## Ebola/Ebolavirus in Title citations during 2014: focus on 2014 outbreak

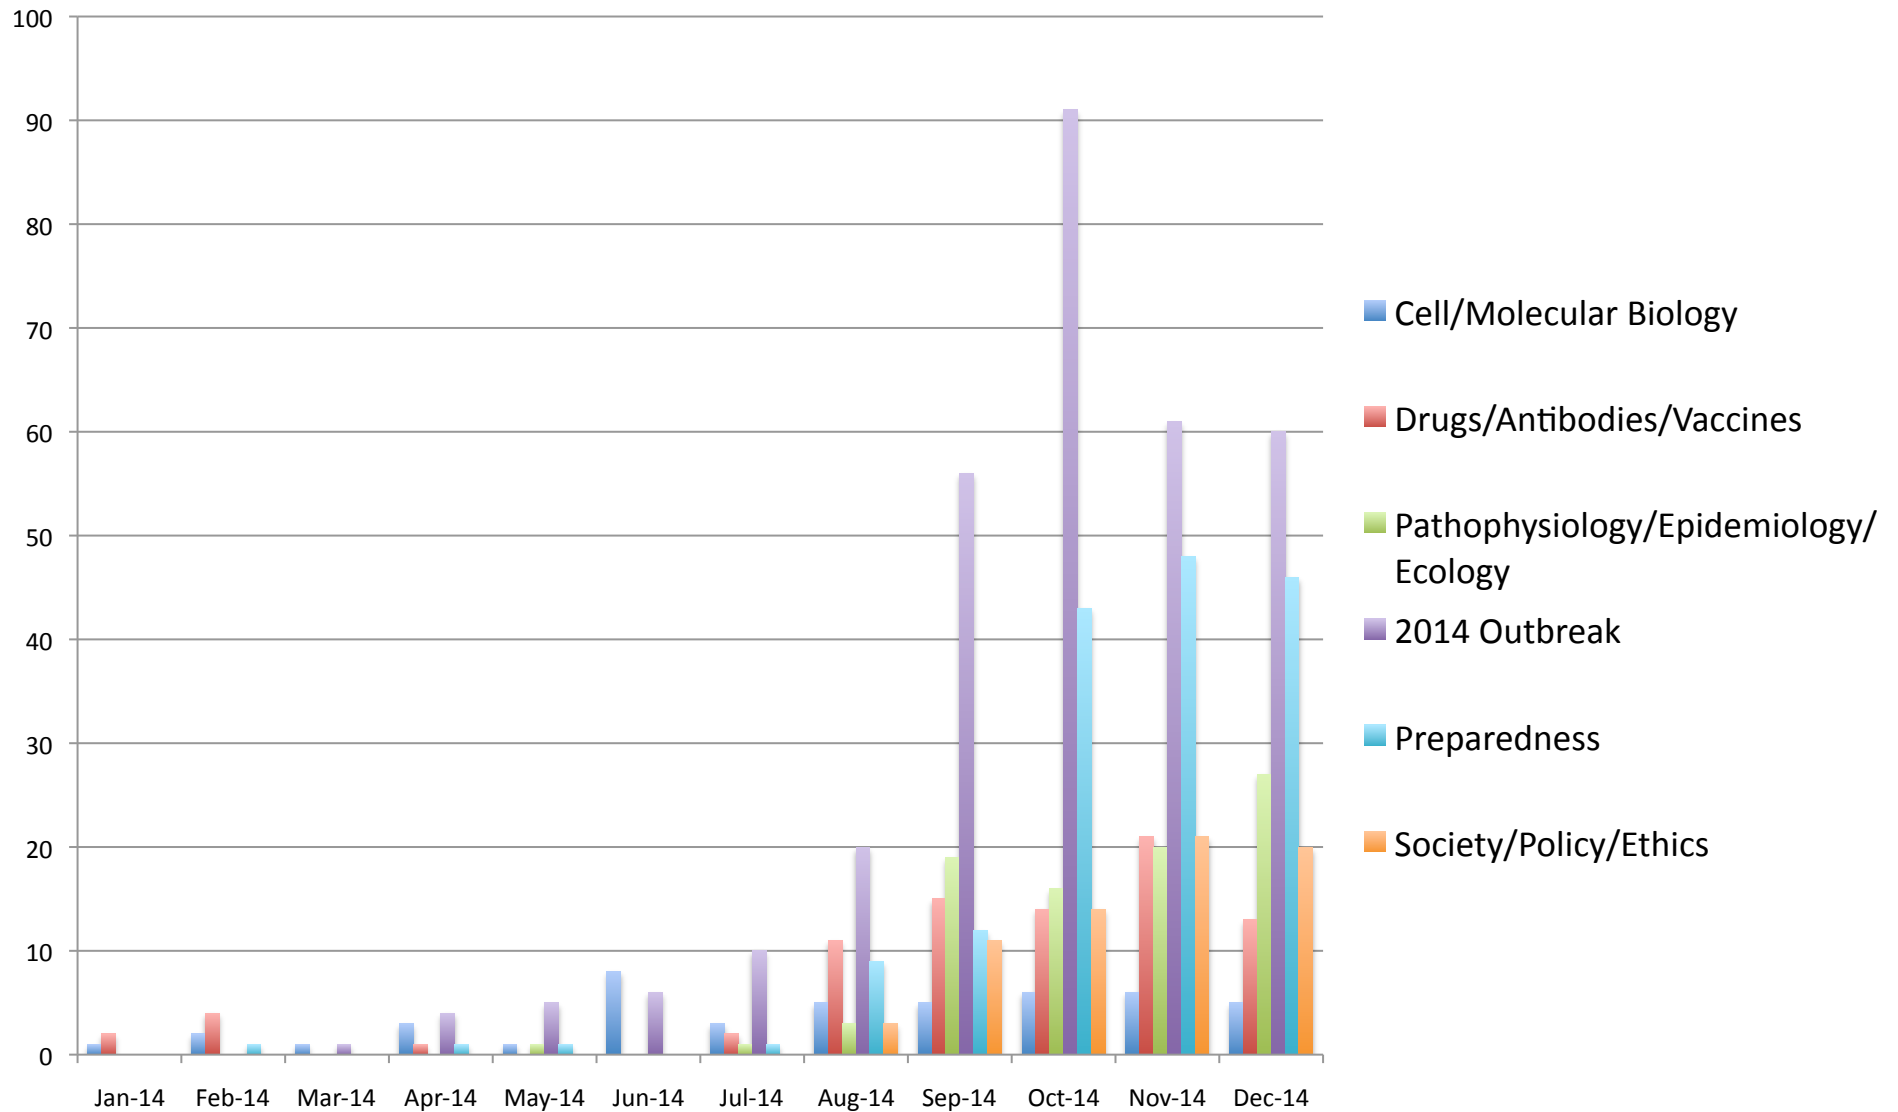

Fig. 20

Supplement: Supplementary file 2 [file 1]

## Ebola/Ebolavirus in Title citations (Abstract available) during 2014

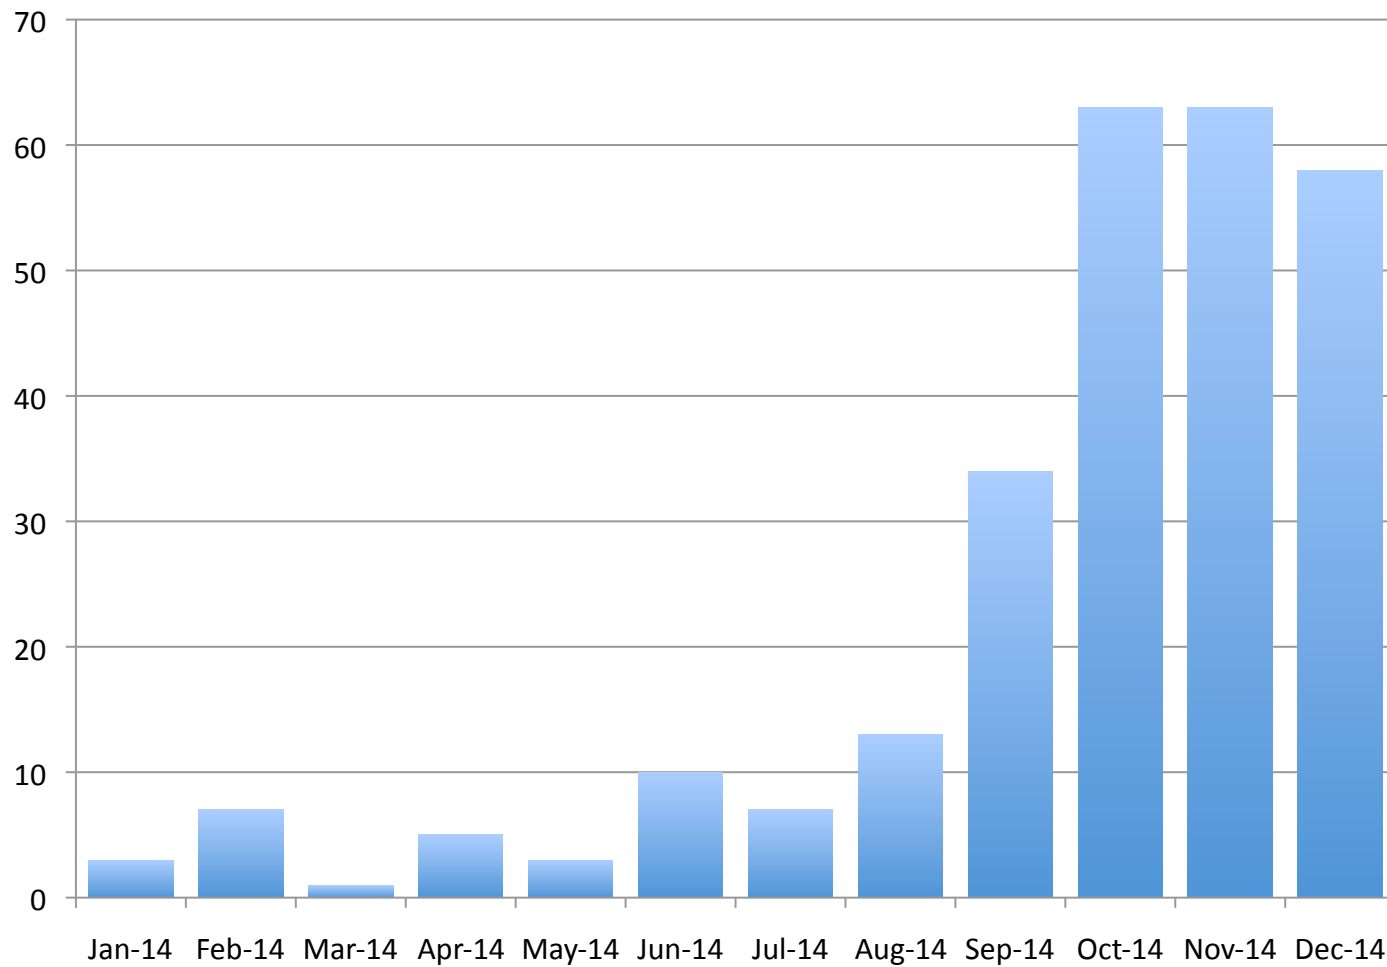

Fig. 18

Supplement: Supplementary file 3 [file 1]

### Ebola/Ebolavirus in Title citations during 2014

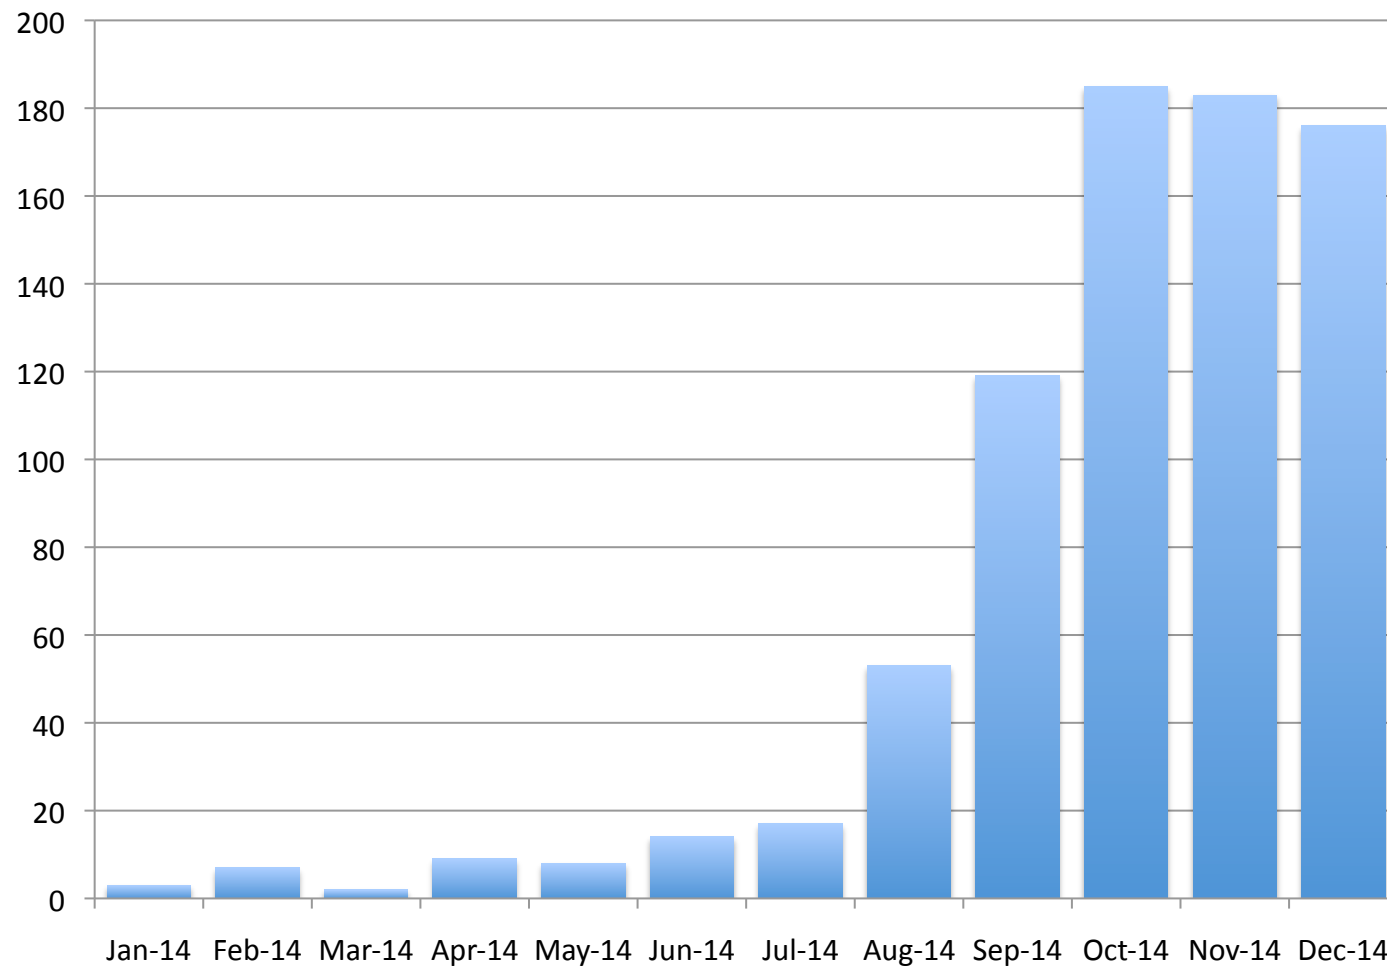

Fig. 17

Supplement: Supplementary file 4 [file 1]

## Ebola/Ebolavirus in Title: 'search term' in Title/Abstract - 2014

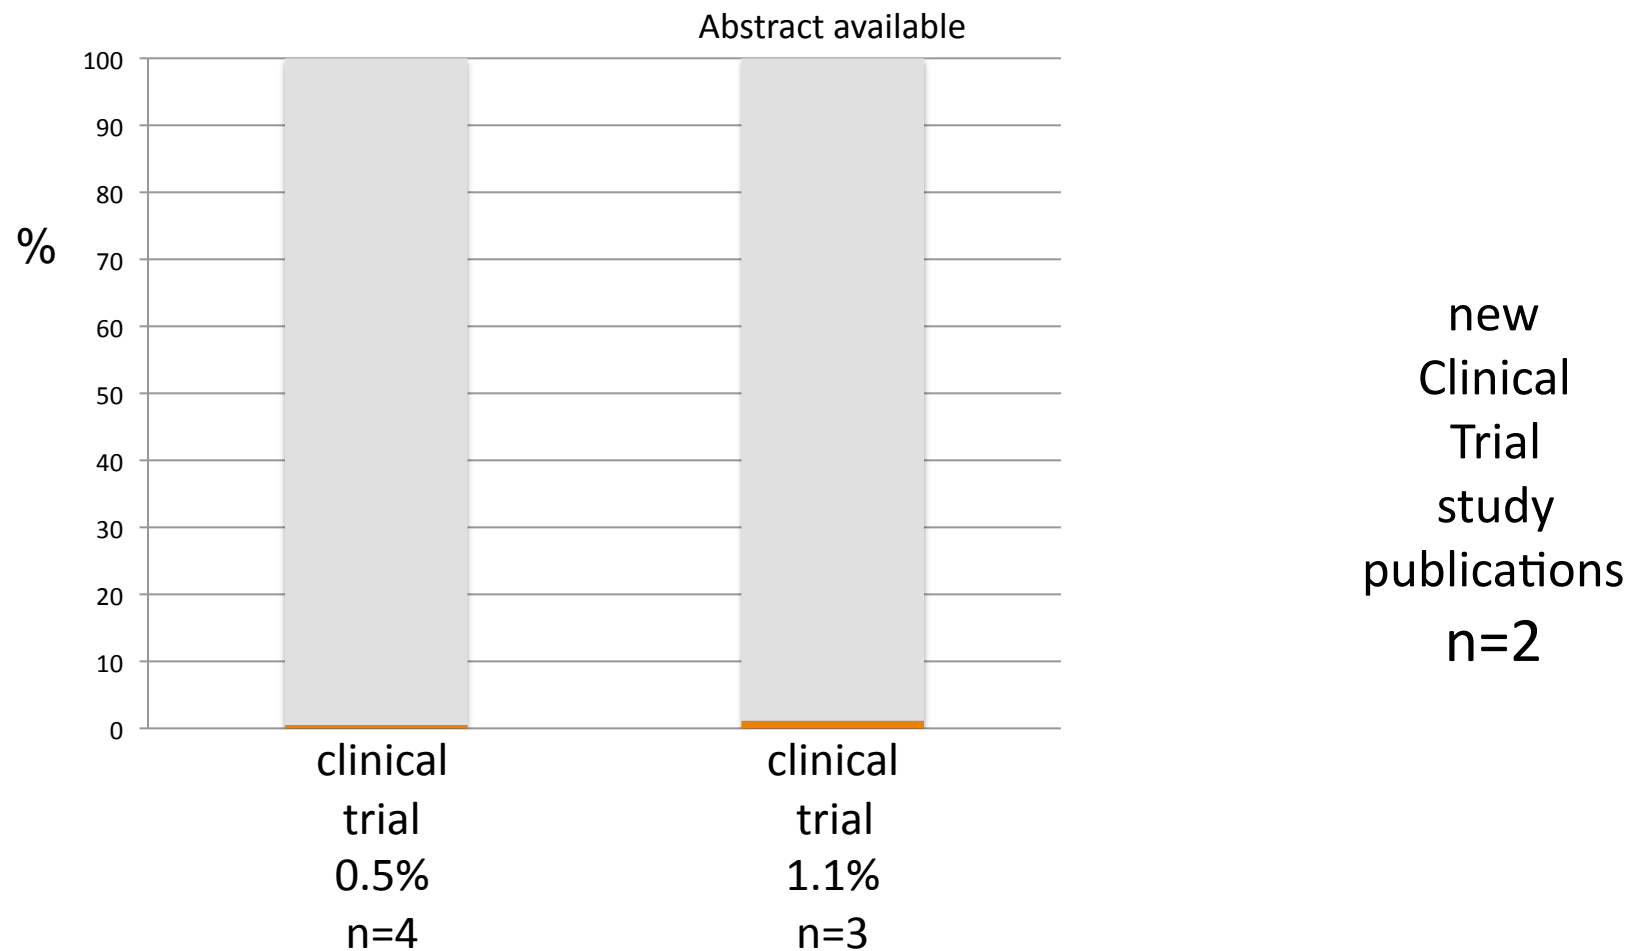

Fig. 16

Supplement: Supplementary file 5 [file 1]

Proportion of citations with Abstract available - 2005-2014

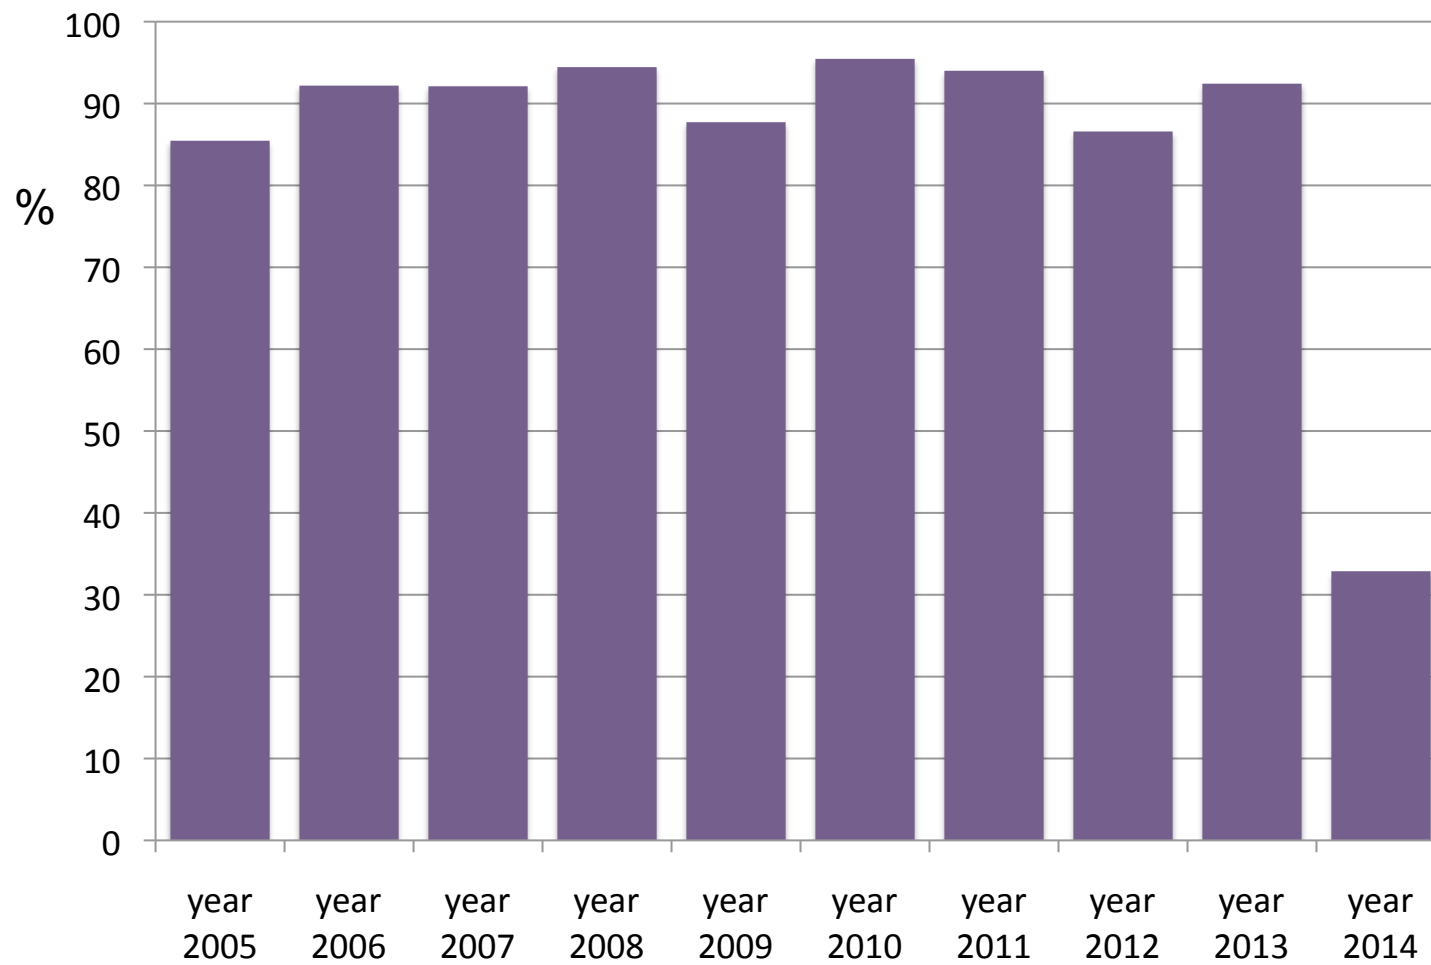

Fig. 5

Supplement: Supplementary file 6 [file 1]

# Ebola/Ebolavirus in Title – ‘Africa’ in Title/Abstract Citations during 2014

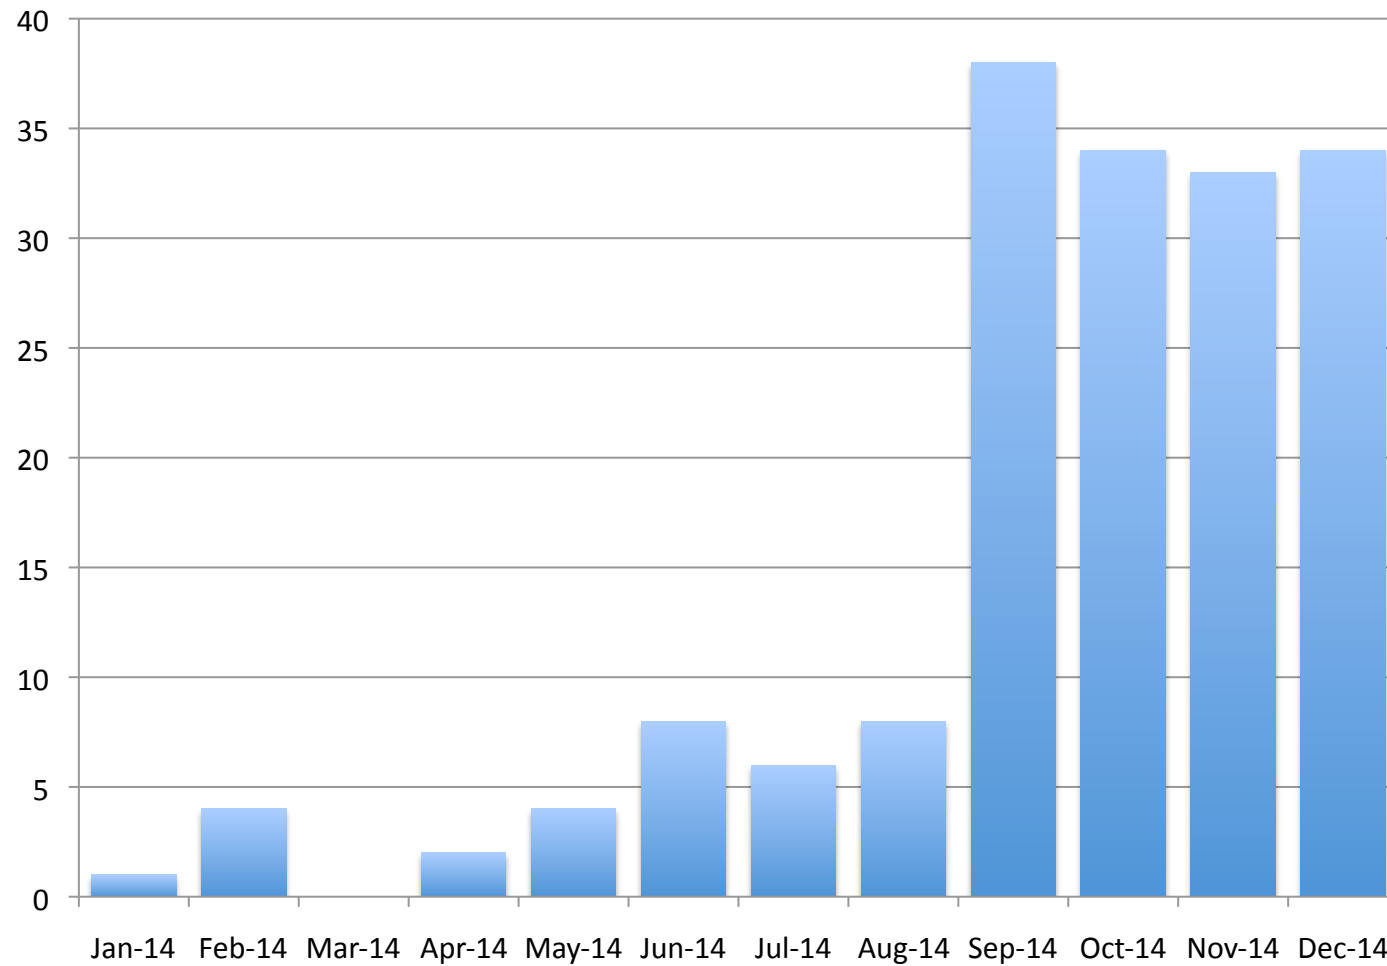

Fig. 22

Supplement: Supplementary file 7 [file 1]

Total biomedical citations 2014  
20 countries with most total biomedical citations

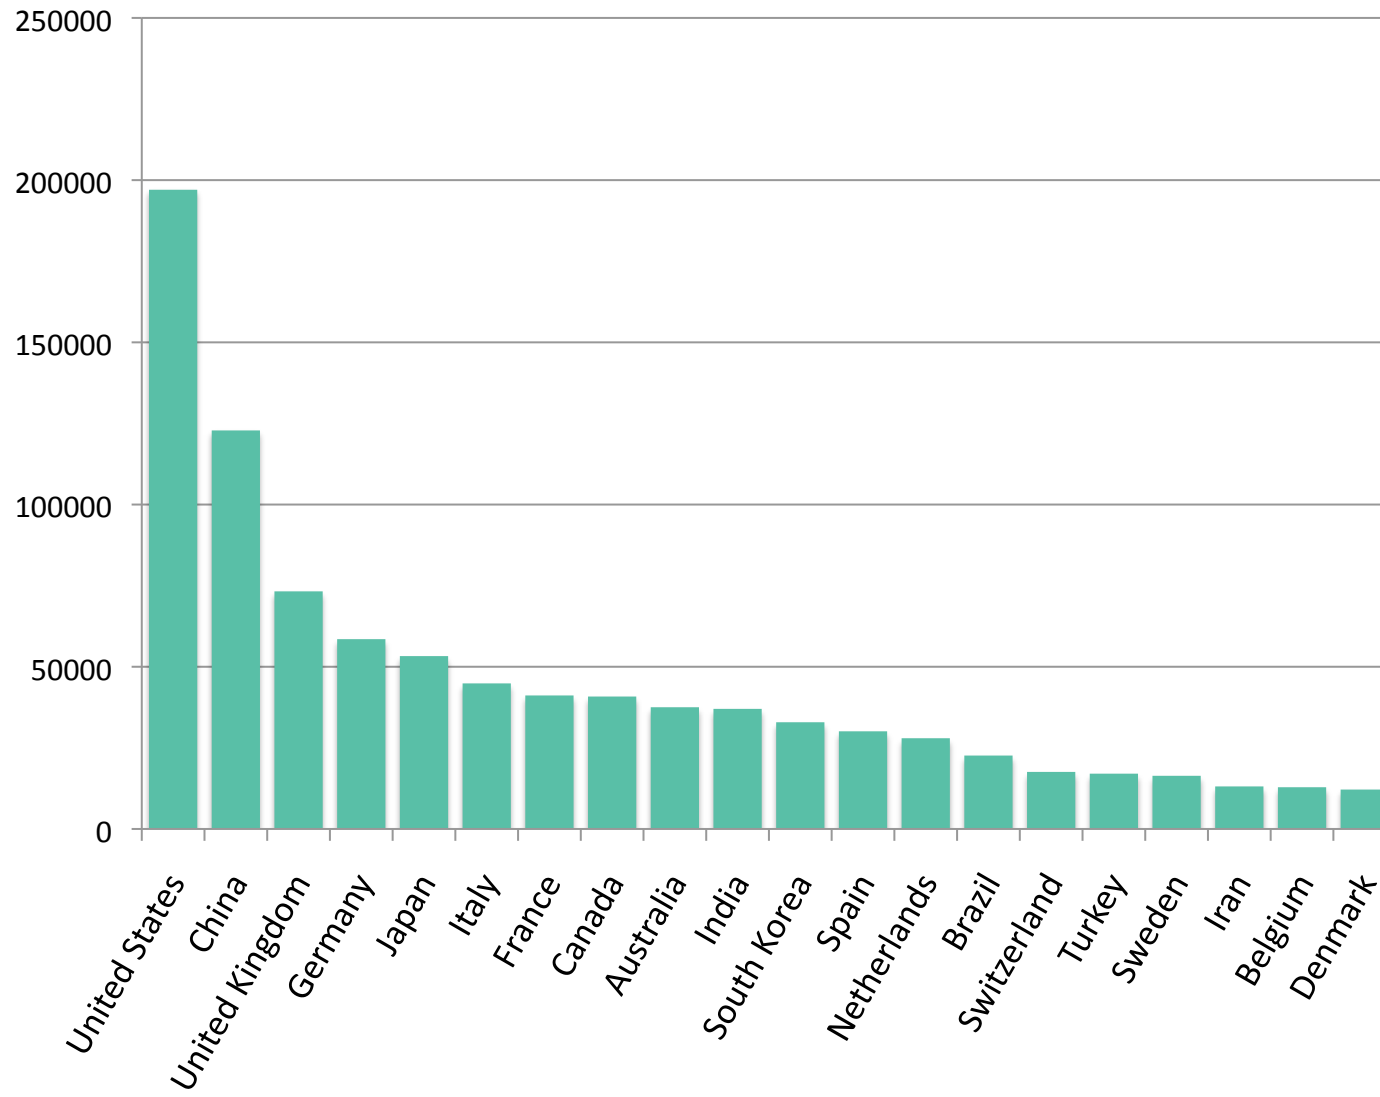

Fig. 24

Supplement: Supplementary file 8 [file 1]

Ebola/Ebolavirus in Title citations 2014  
6 countries with most Ebola-related citations 2014

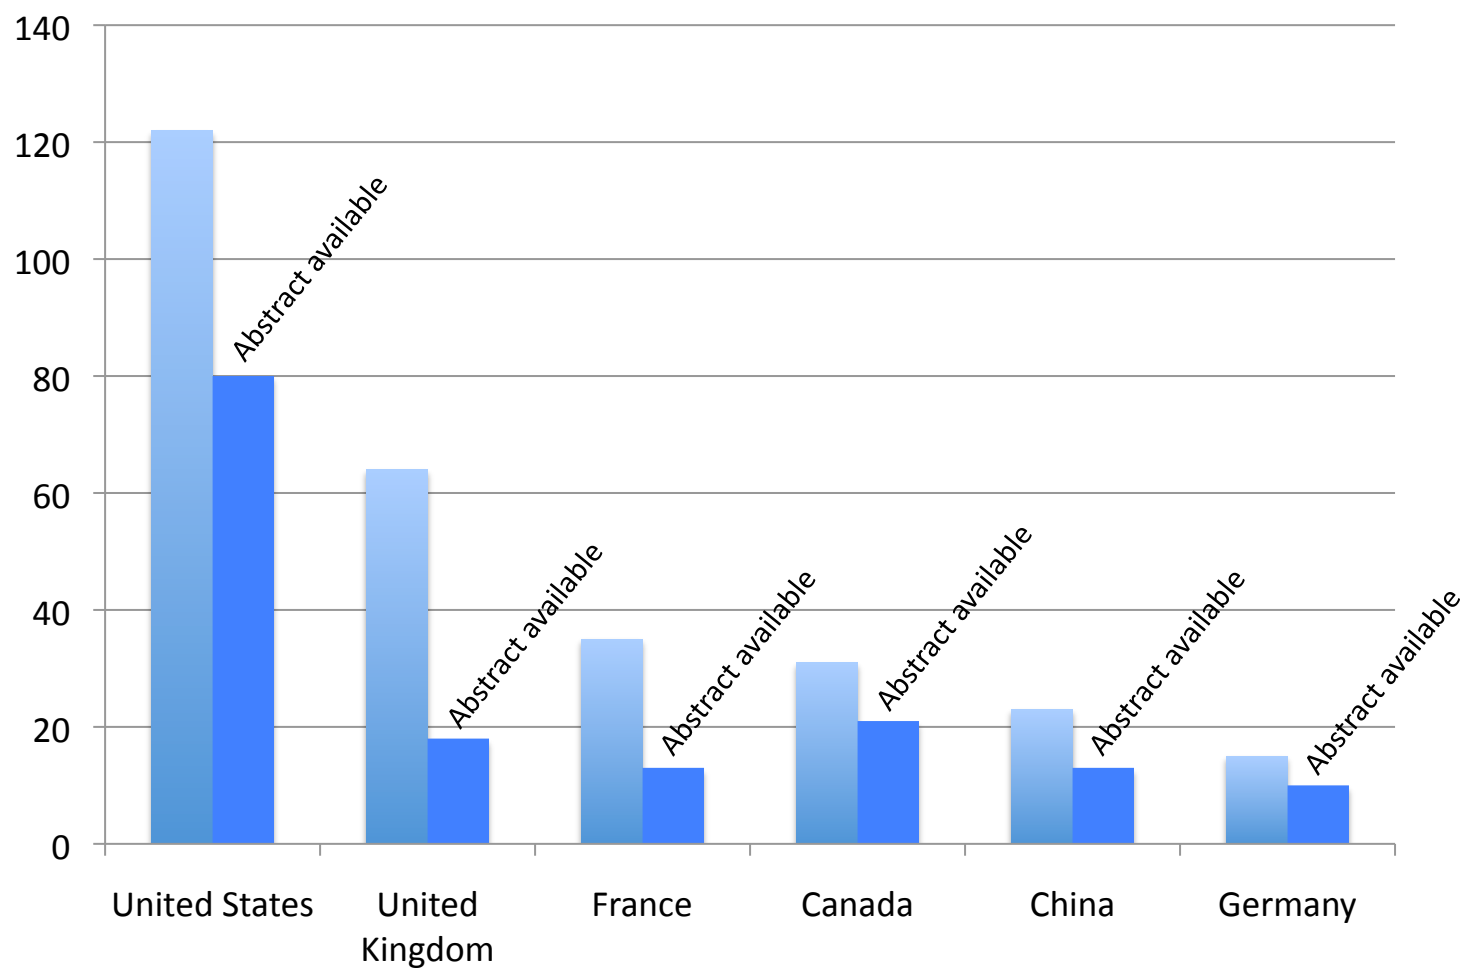

Fig. 31

Supplement: Supplementary file 9 [file 1]

Ebola/Ebolavirus in Title citations 2014  
20 countries with most total biomedical citations

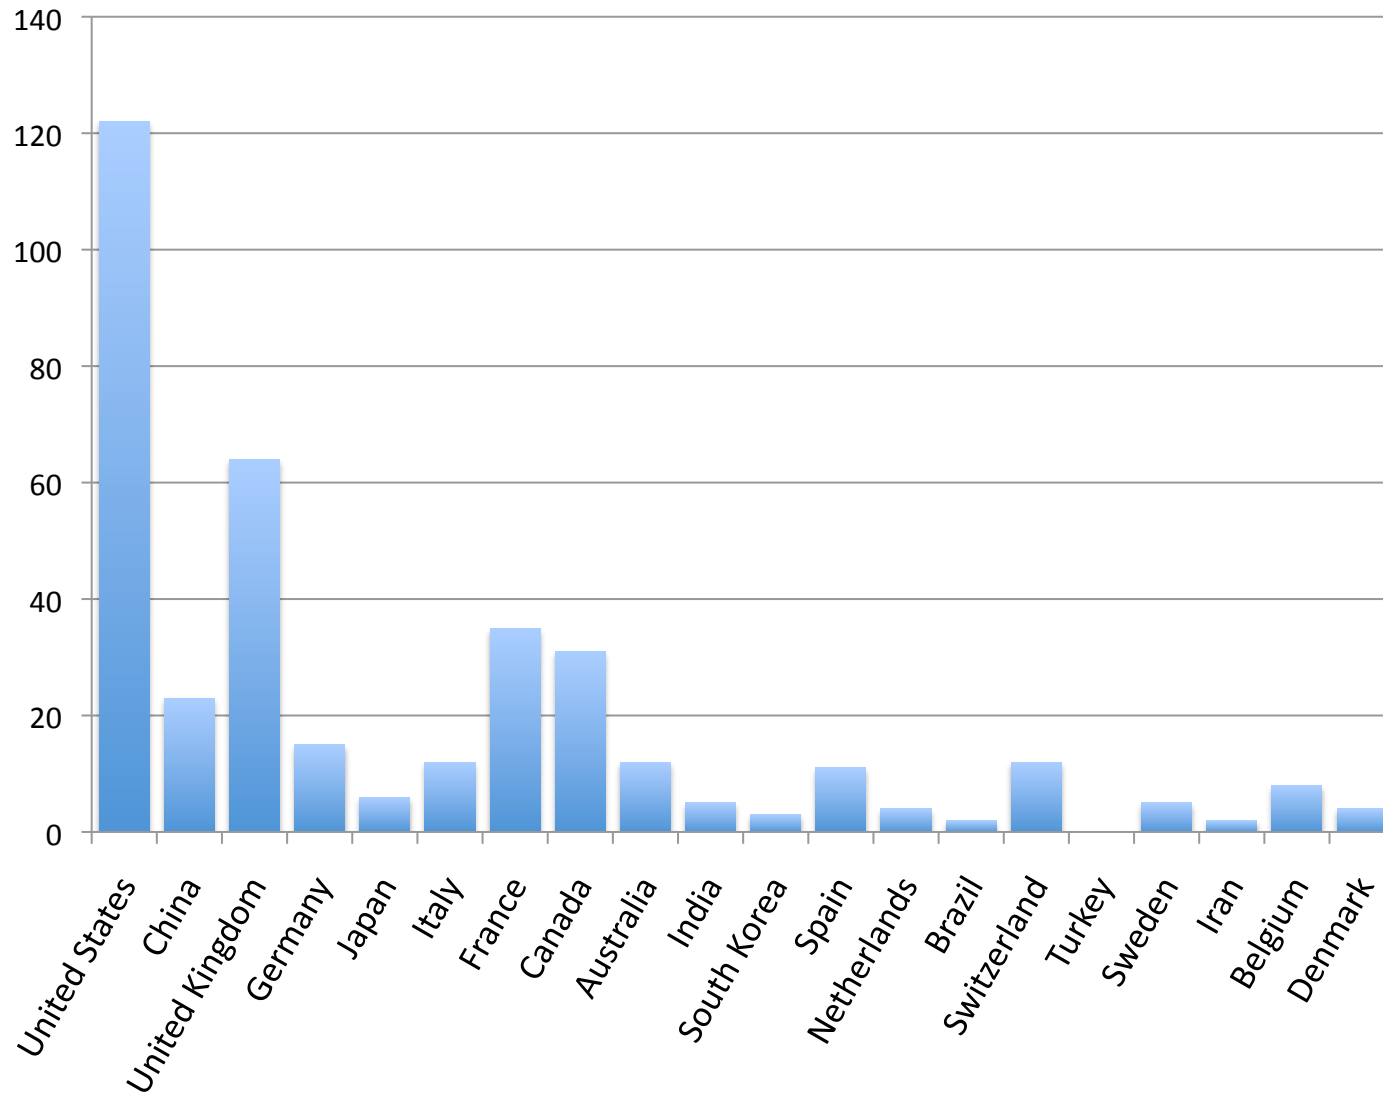

Fig. 25

Supplement: Supplementary file 11 [file 1]

Ebola/Ebolavirus in Title citations 1995-2014

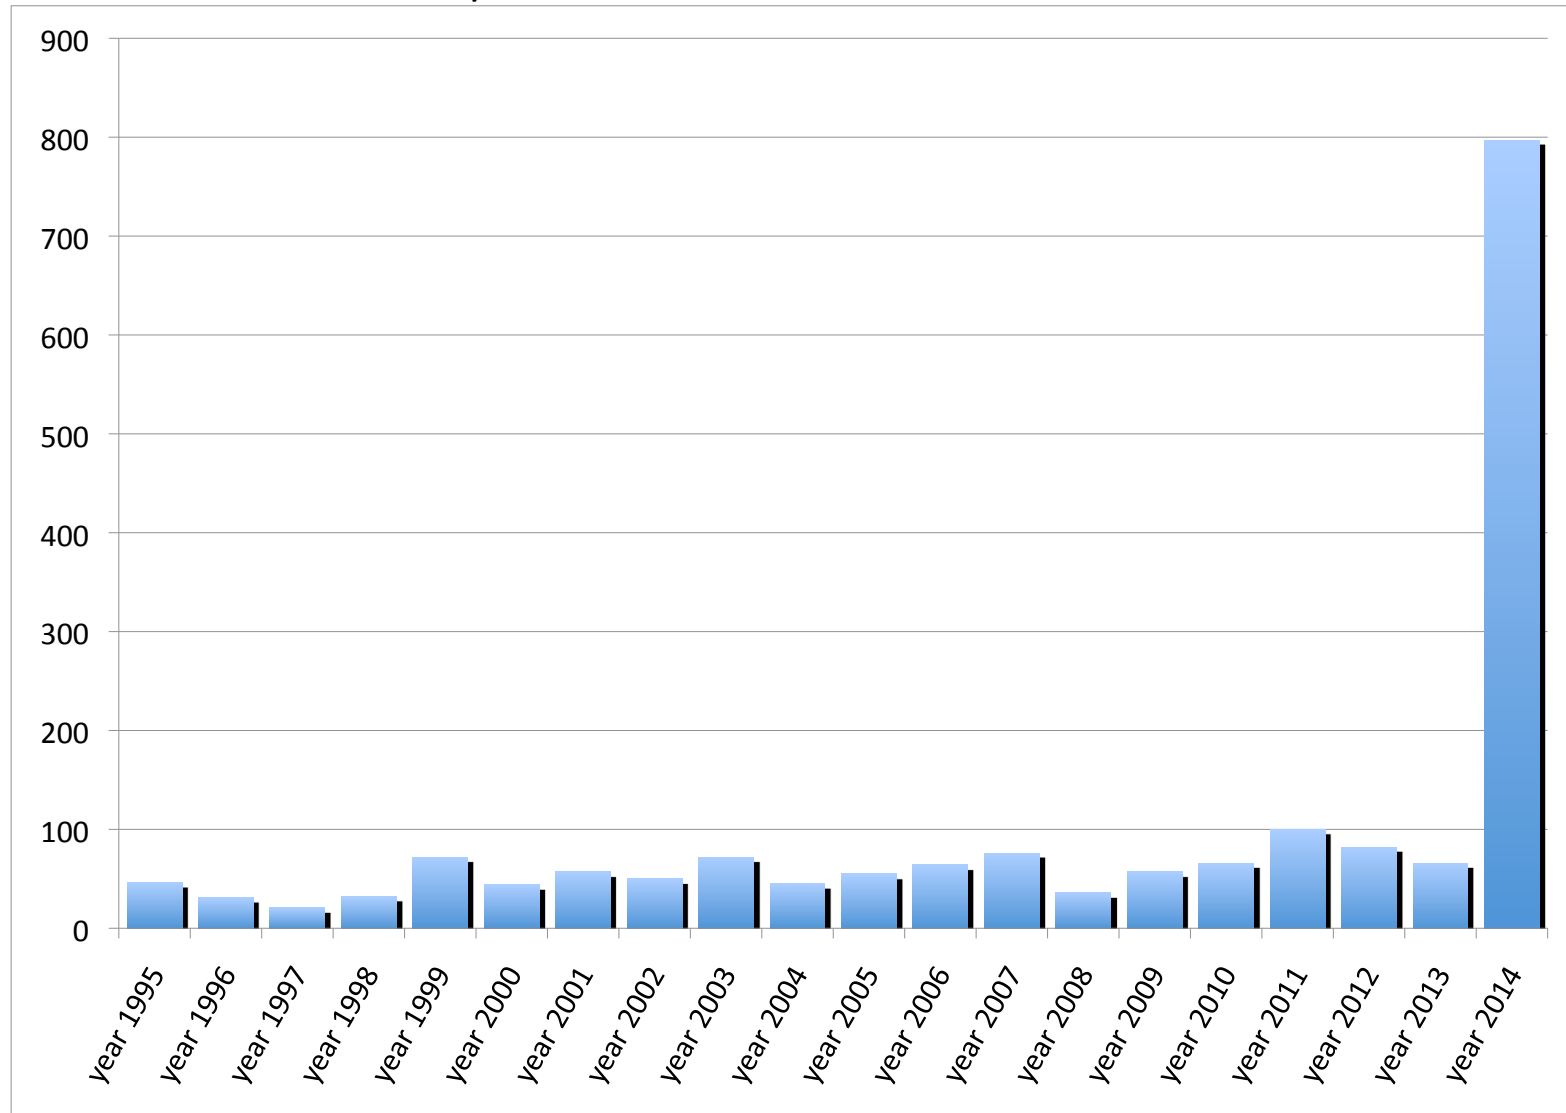

Fig. 3

Supplement: Supplementary file 15 [file 1]

# Ebola/Ebolavirus in Title – ‘Vaccine or Vaccines’ in Title/Abstract Citations during 2014

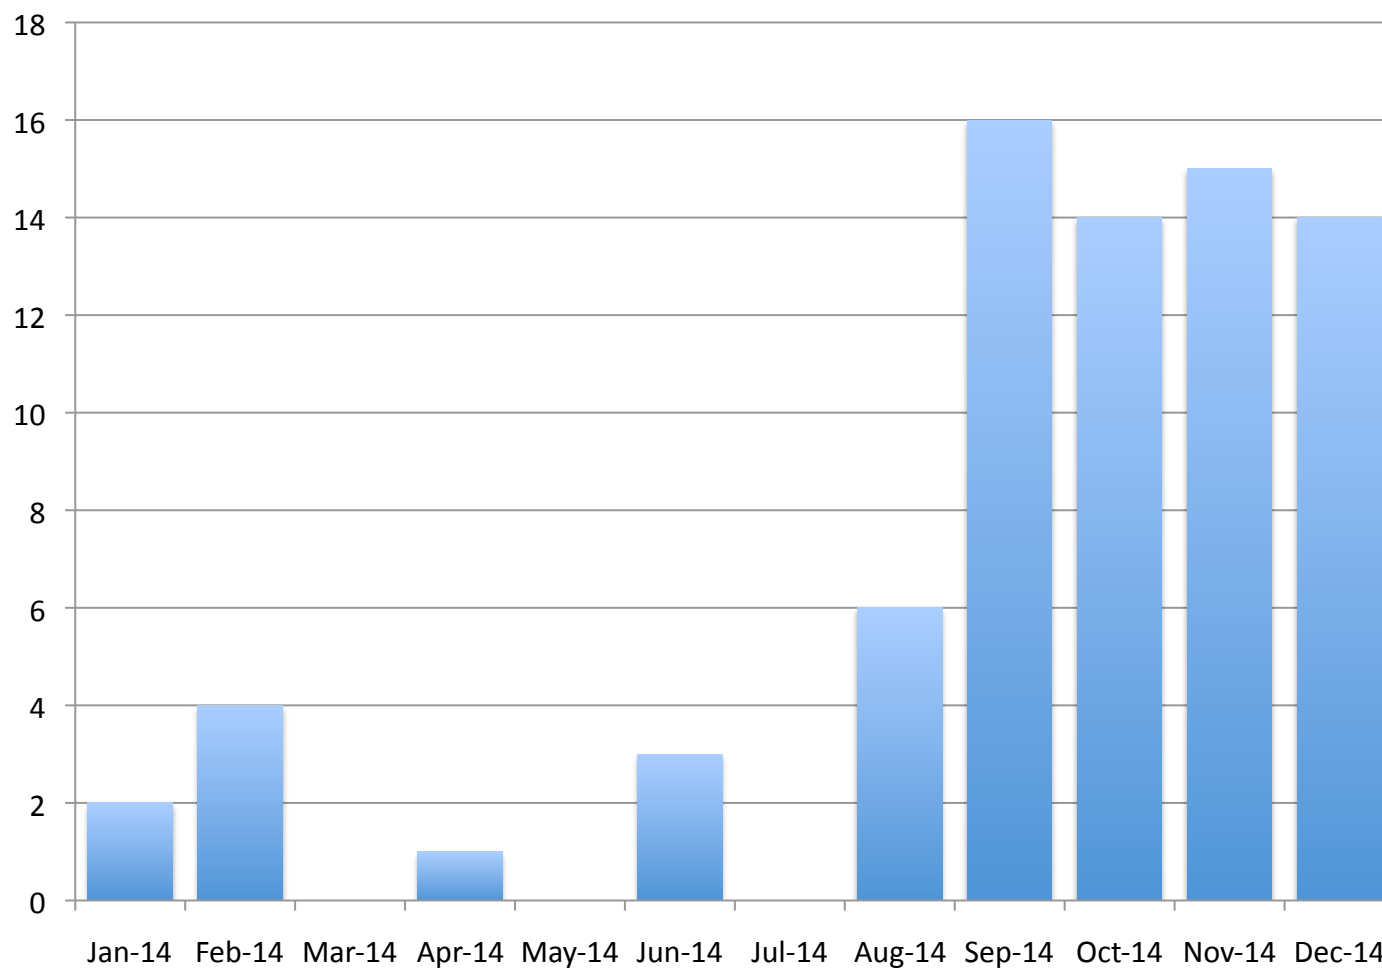

Fig. 23

Supplement: Supplementary file 16 [file 1]

Ebola/Ebolavirus in Title – ‘Outbreak’ in Title/Abstract  
Citations during 2014

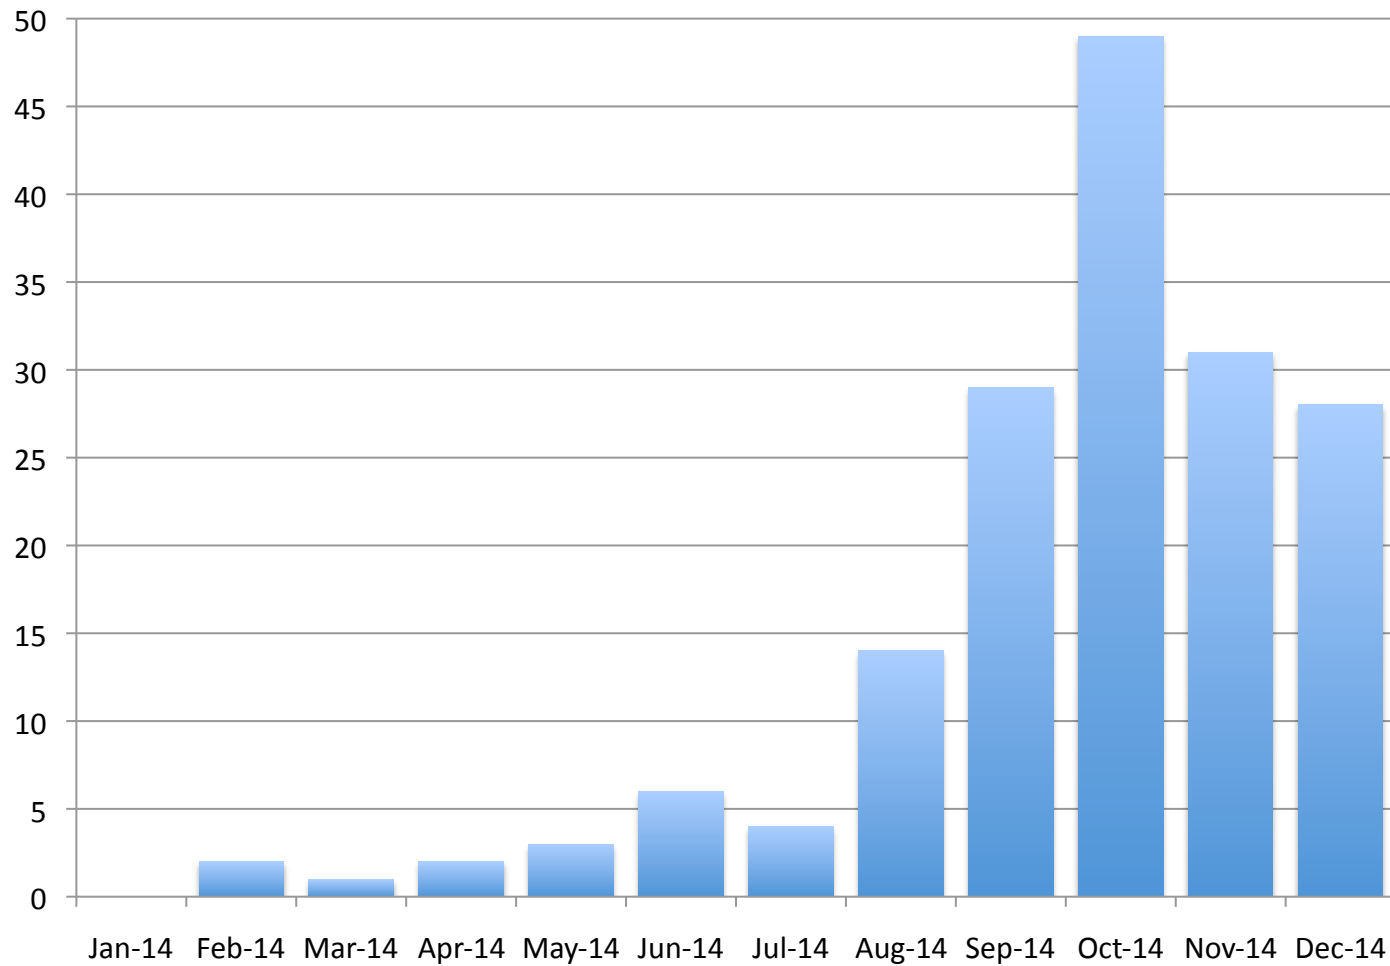

Fig. 21

Supplement: Supplementary file 17 [file 1]

## Ebola/Ebolavirus in Title citations 2014: focus on 2014 outbreak

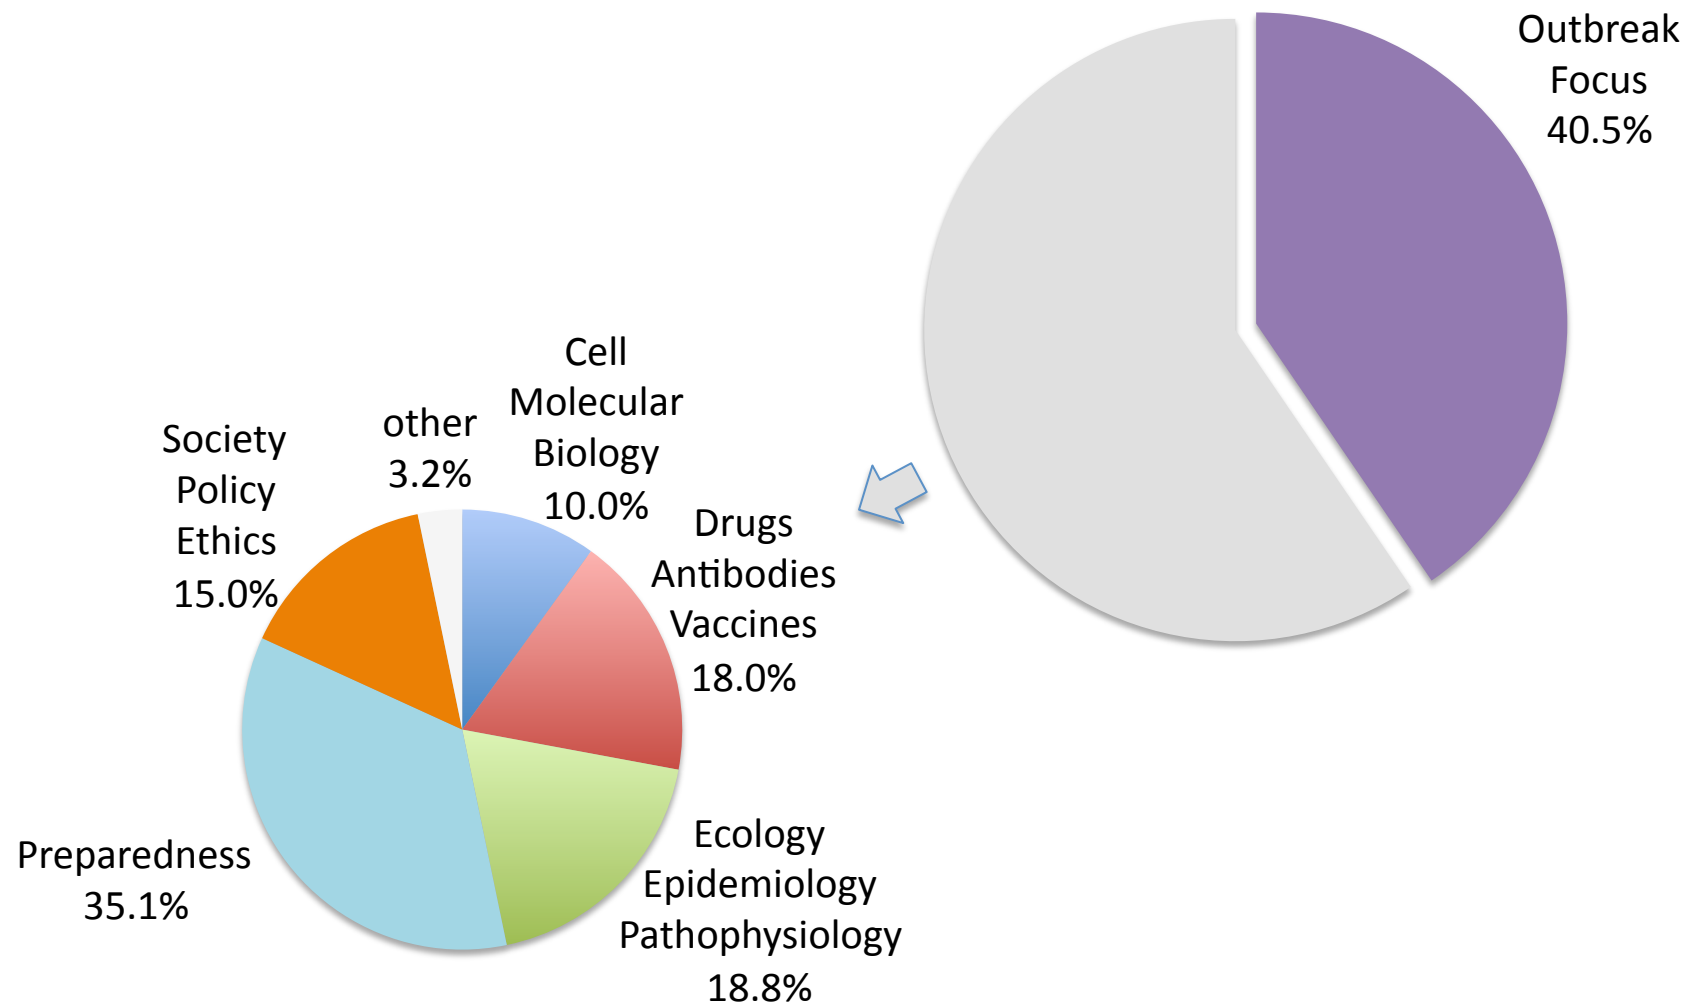

Fig. 19

Supplement: Supplementary file 19 [file 1]

# Ebola/Ebolavirus in Title (Abstract available): 'search terms' in Title/Abstract - 2014

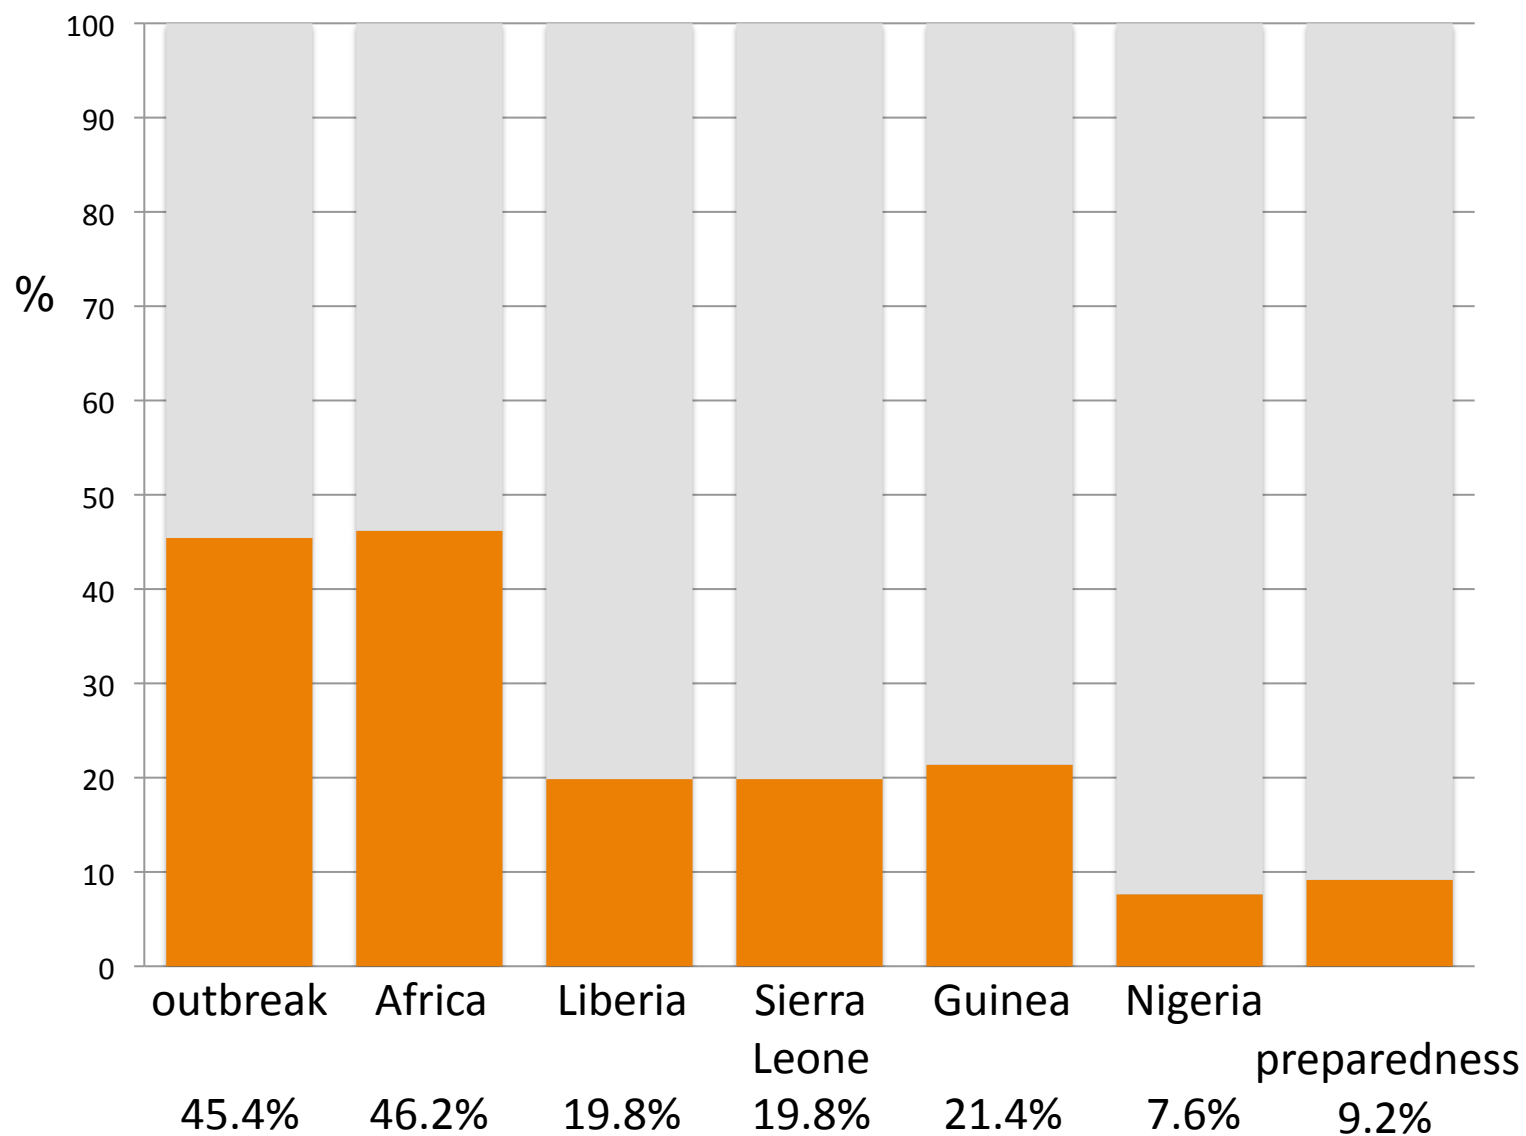

Fig. 15

Supplement: Supplementary file 21 [file 1]
